# Supplementary material for: Complex chemoattractive and chemorepellent Kit signals revealed by direct imaging of murine mast cells in microfluidic gradient chambers
Source: Royal Society of Chemistry journal article supplement (doi:10.1039/c3ib40025e), 2013-01-01
Supplement: c3ib40025e.pdf [file c3ib40025e.pdf]

### Supplementary Figure 1

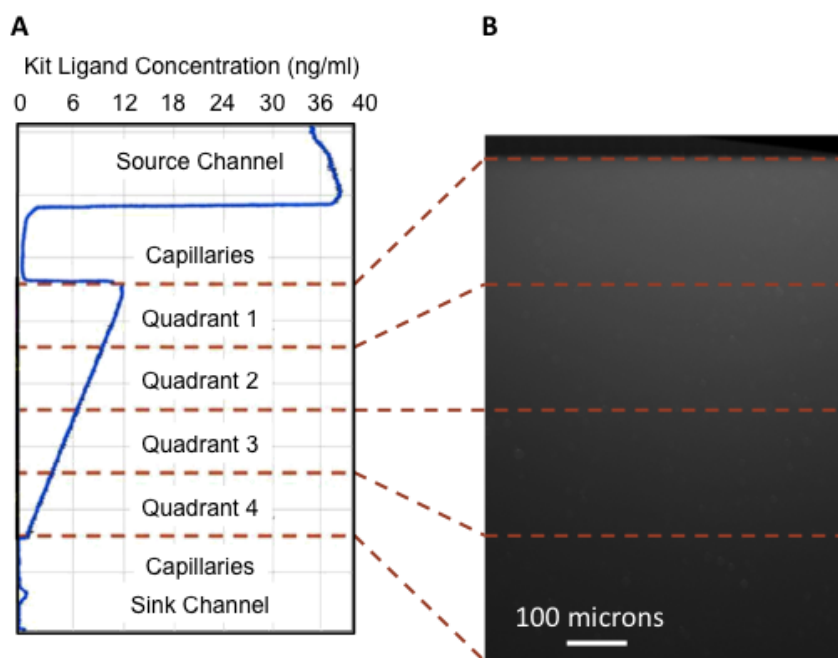

**Supplementary Figure 1. Quantification of kit ligand concentration using FITC-dextran gradient.** **A.** The concentration profile, plotted in blue, within the device was quantified using a FITC-dextran gradient, and it shows a linear concentration gradient of KL across the width of the microfluidic chamber. Dotted red lines indicate the quadrant boundaries. **B.** A fluorescent image of the FITC-dextran gradient across the microfluidic biochamber
